# Supplementary material for: A 10-Year Retrospective Study of Inclusion Body Hepatitis in Meat-Type Chickens in Spain (2011–2021)
Source: Viruses. 2021 Oct 28;13(11):2170. doi: 10.3390/v13112170 (PMC8617850; doi:10.3390/v13112170)
Supplement: Supplementary file 1 [file viruses-13-02170-s001.zip › viruses-1434093-supplementary.pdf]

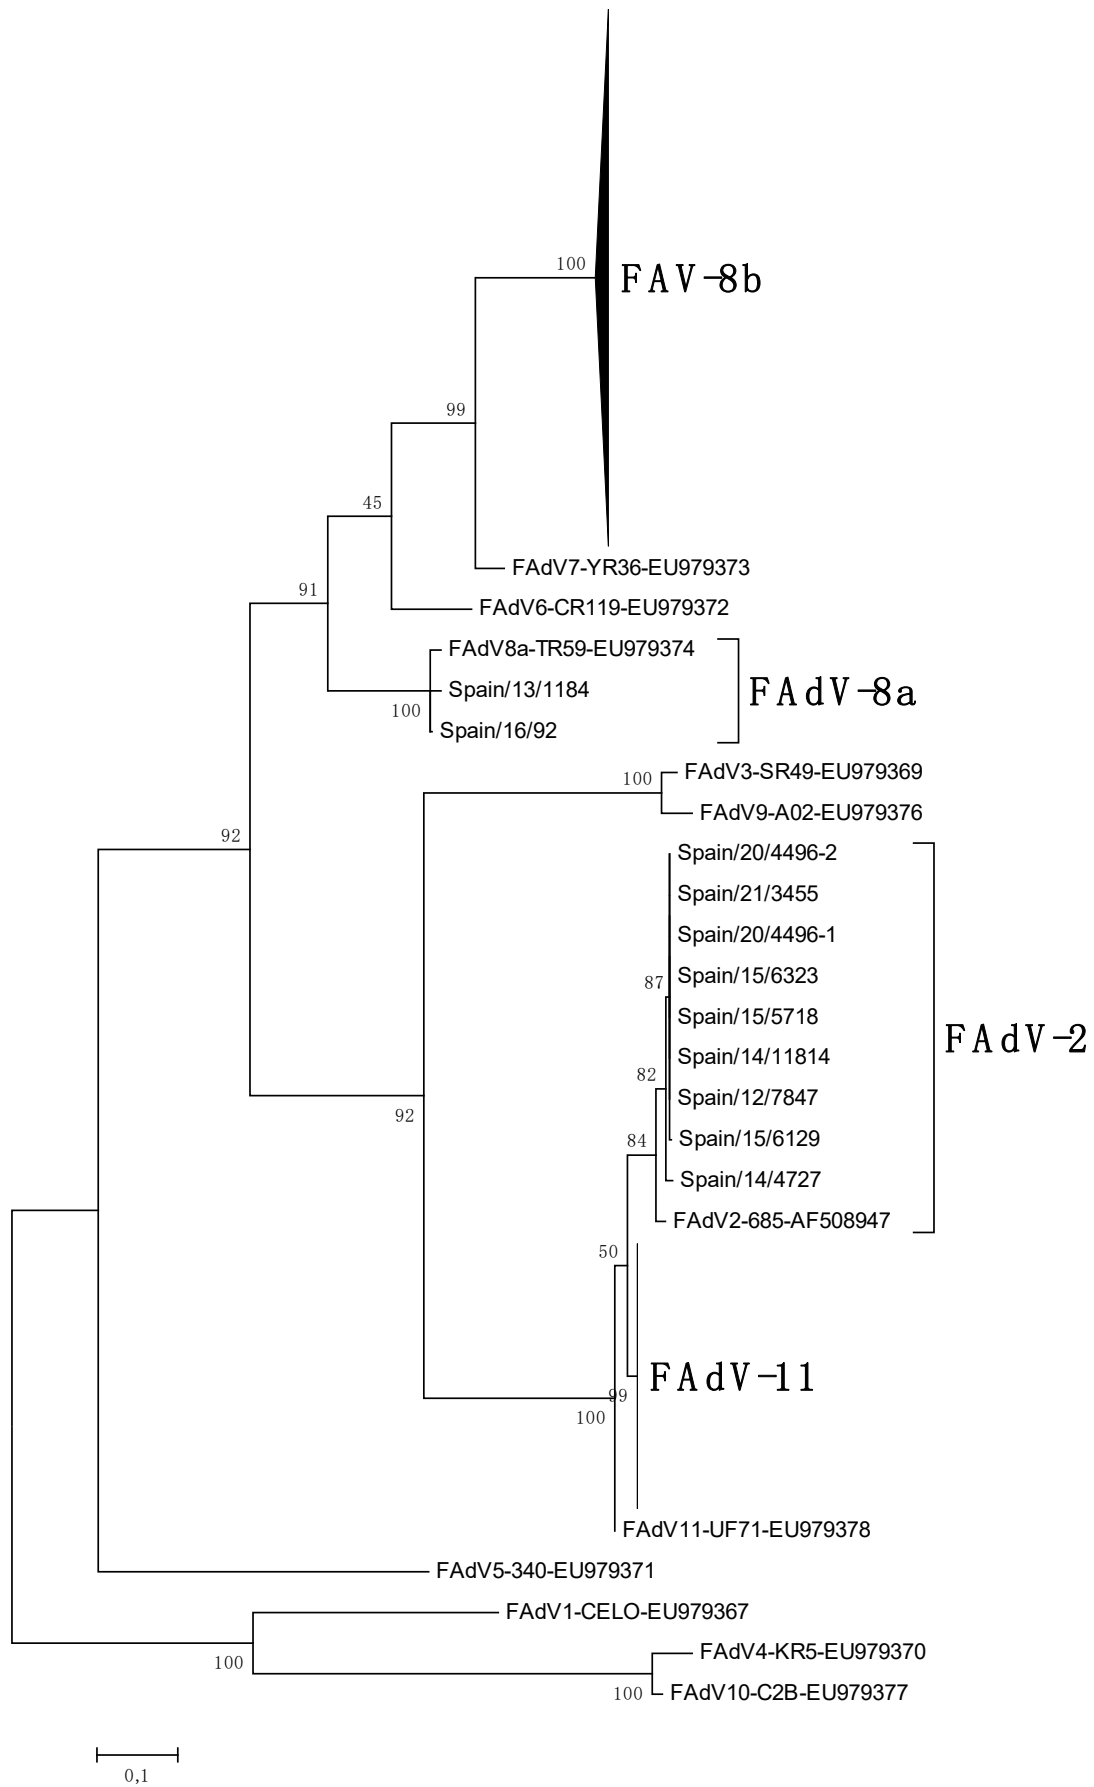

**Figure S1. Maximum-likelihood phylogenetic tree.** Maximum-likelihood phylogenetic tree with 1000 bootstrap replicates showing the relationships among the nucleotide partial sequences of the FAdV hexon gene (final alignment length 470 bp). FAdV strains (n=246) detected from June 2011 to May 2021 from commercial meat-type chickens in Spain and main reference FAdV serotype strains (n=12) are compared. Horizontal branches indicate the sequence distance (number of nucleotide substitutions per site) and are drawn to scale.
